# Supplementary material for: New Diterpenoids from Soft Coral Sarcophyton ehrenbergi
Source: PubMed Central journal article supplement (PMC3853730; doi:10.3390/md11114318), 2013-10-30

# Supplementary Materials

Figure S1.  $^1\text{H}$  NMR spectrum (400 MHz) of compound 1 in  $\text{CDCl}_3$ .

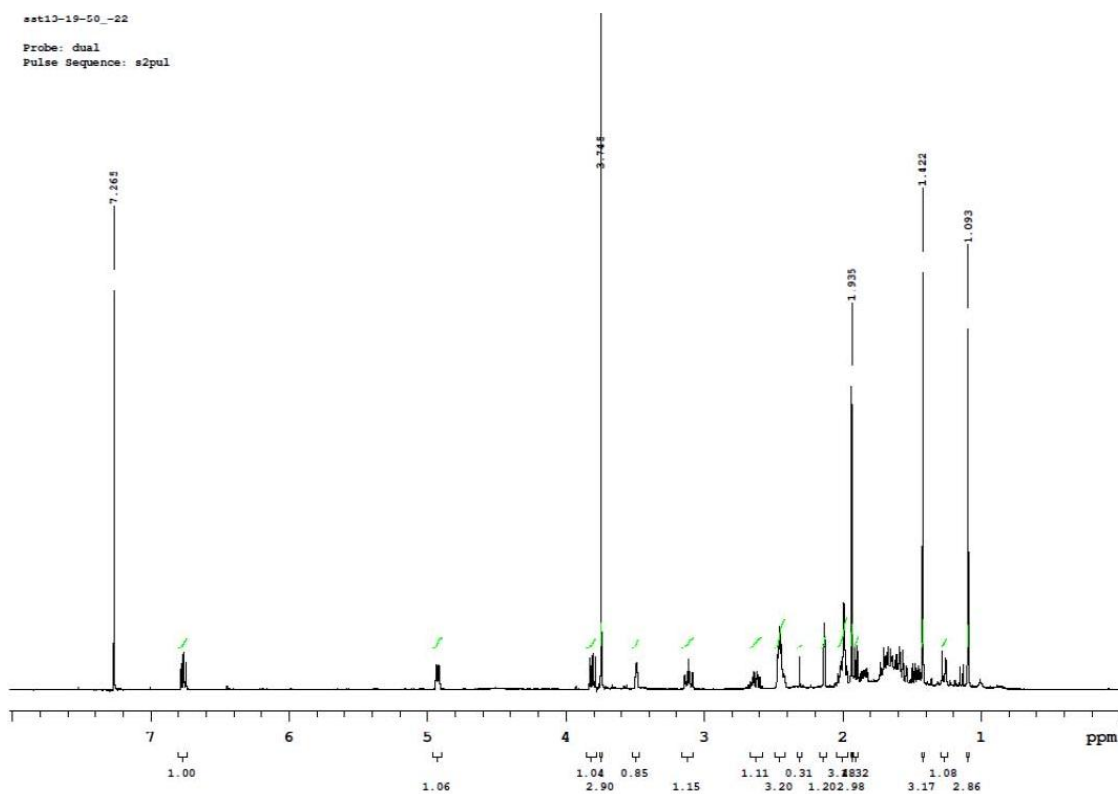

Figure S2.  $^{13}\text{C}$  NMR spectra (100 MHz) of compound 1 in  $\text{CDCl}_3$ .

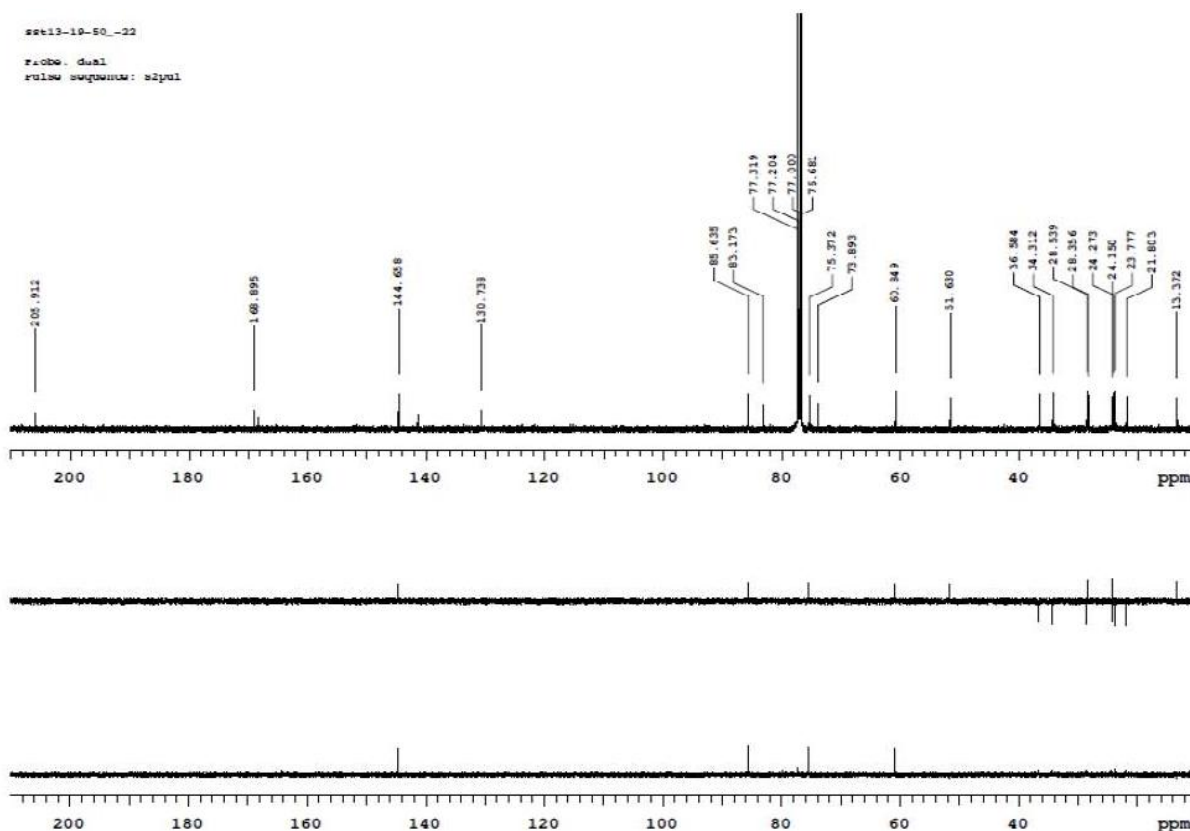

**Figure S3.** COSY spectrum (400 MHz) of compound **1** in CDCl<sub>3</sub>.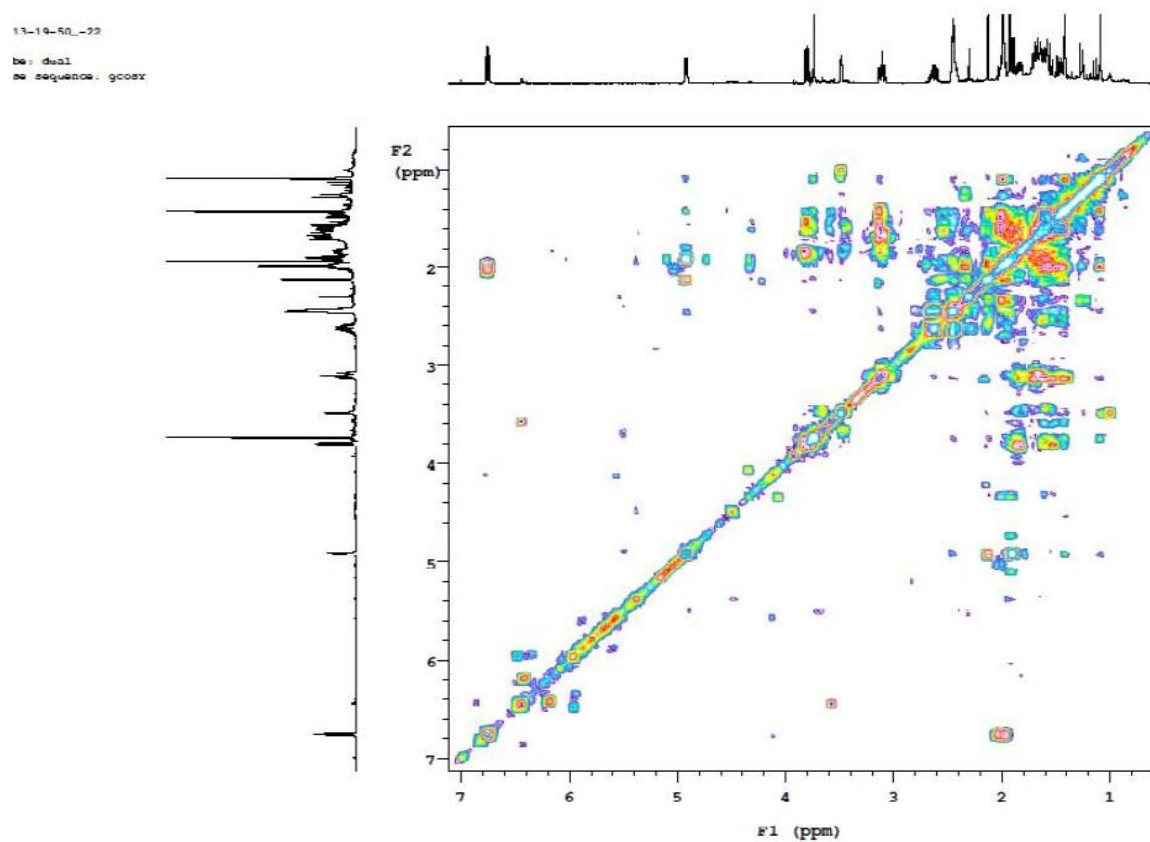**Figure S4.** HSQC spectrum (400 MHz) of compound **1** in CDCl<sub>3</sub>.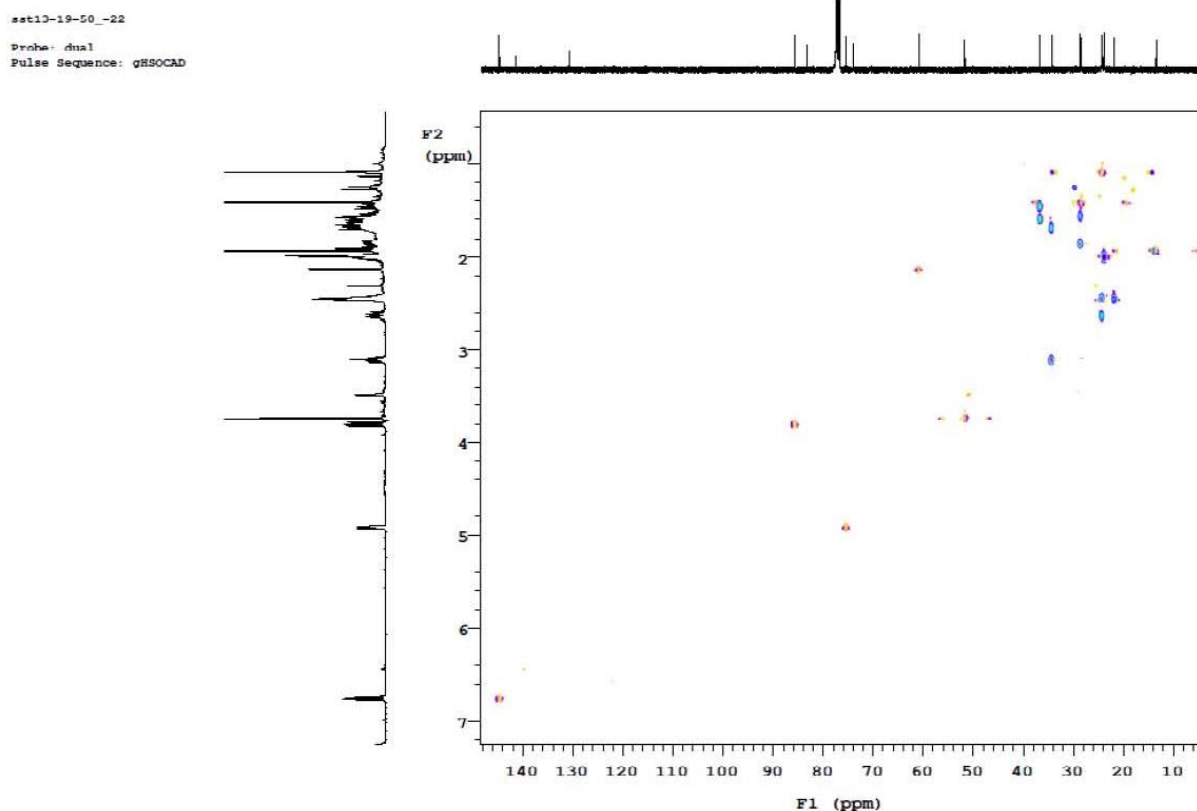

**Figure S5.** HMBC spectrum (400 MHz) of compound **1** in CDCl<sub>3</sub>.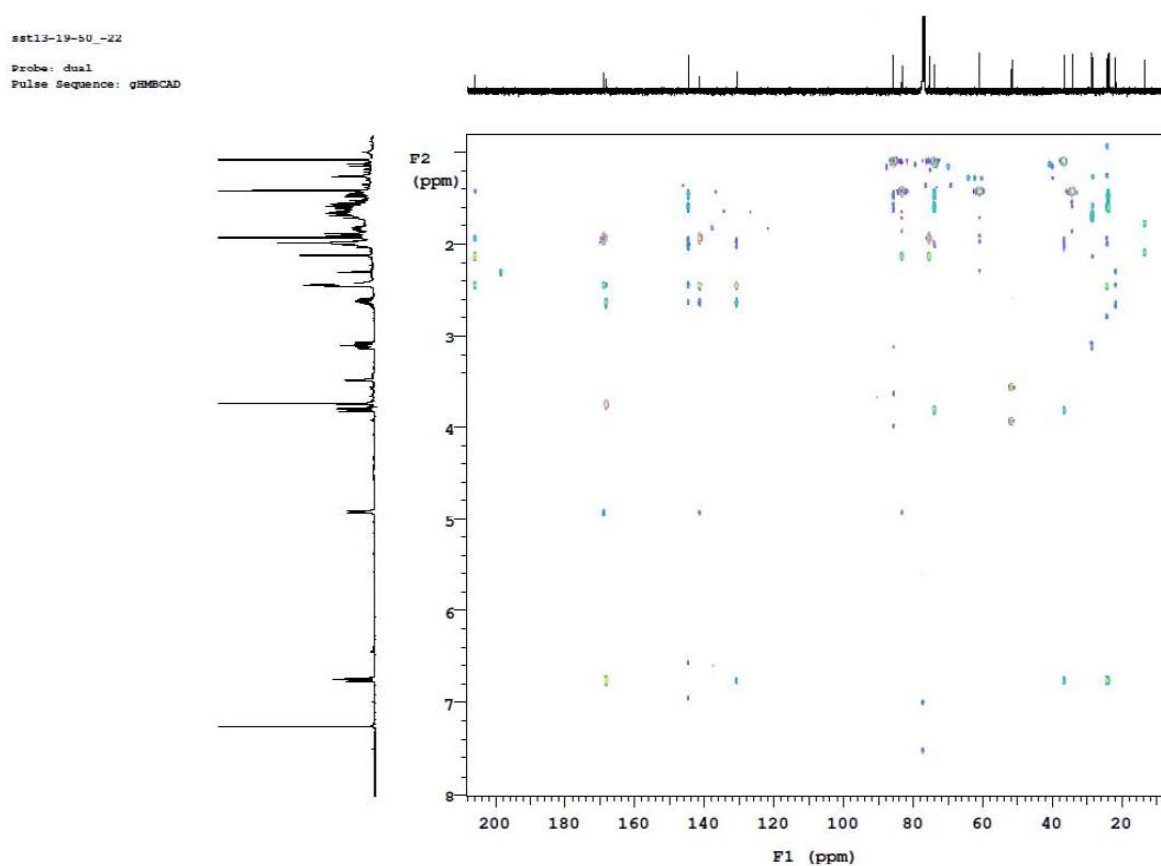**Figure S6.** NOESY spectrum (400 MHz) of compound **1** in CDCl<sub>3</sub>.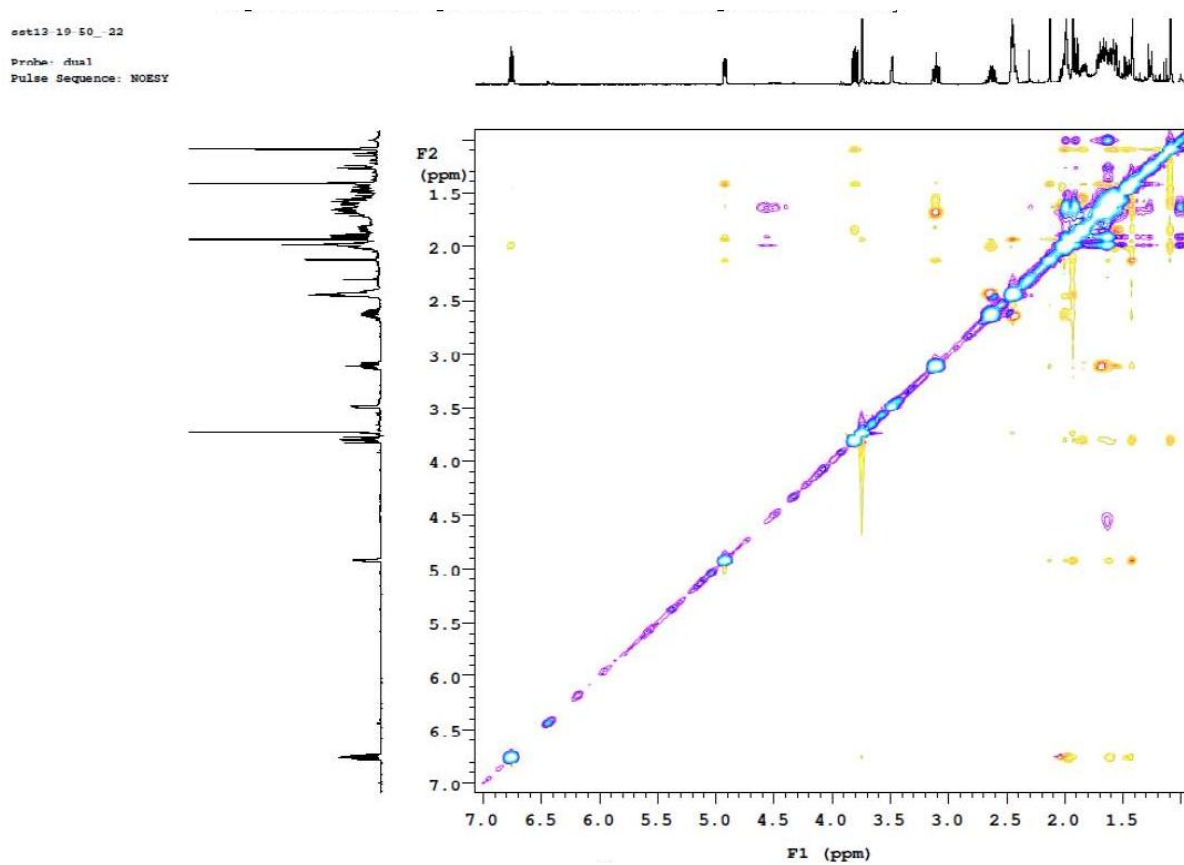

**Figure S7.**  $^1\text{H}$  NMR spectrum (400 MHz) of compound **2** in  $\text{C}_6\text{D}_6$ .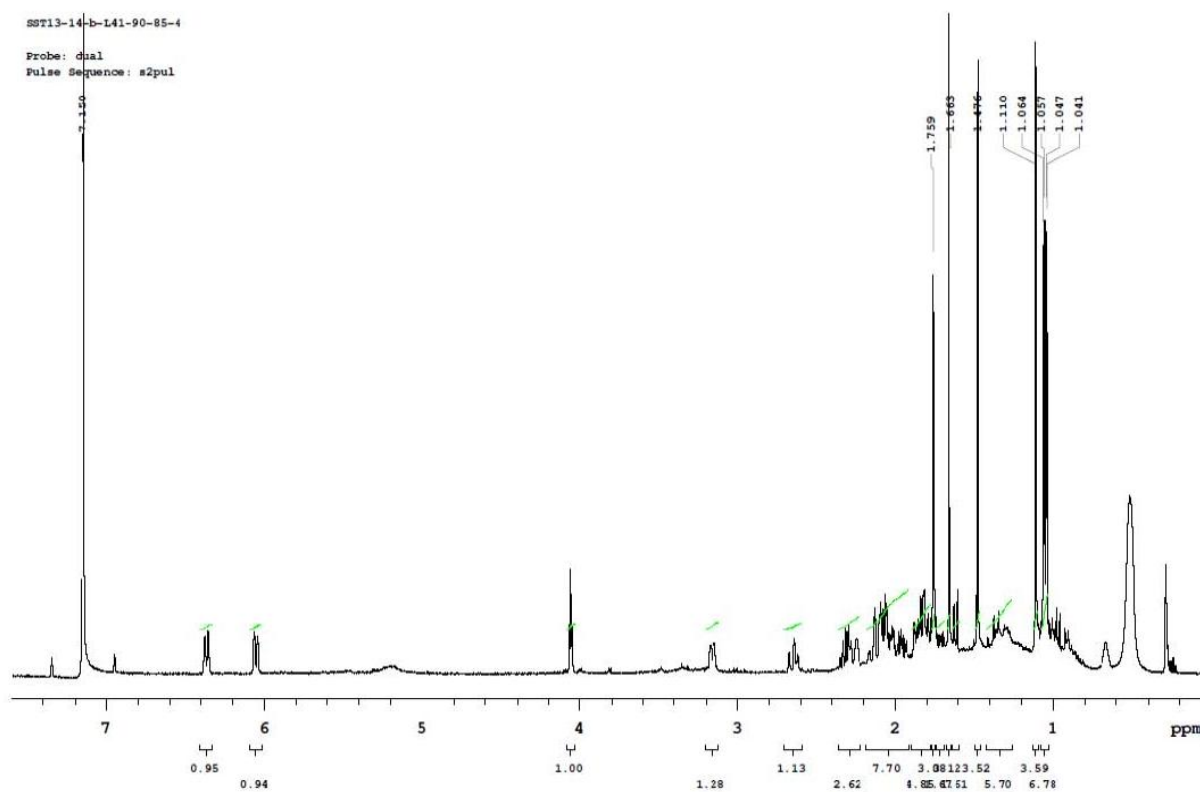**Figure S8.**  $^{13}\text{C}$  NMR spectra (100 MHz) of compound **2** in  $\text{C}_6\text{D}_6$ .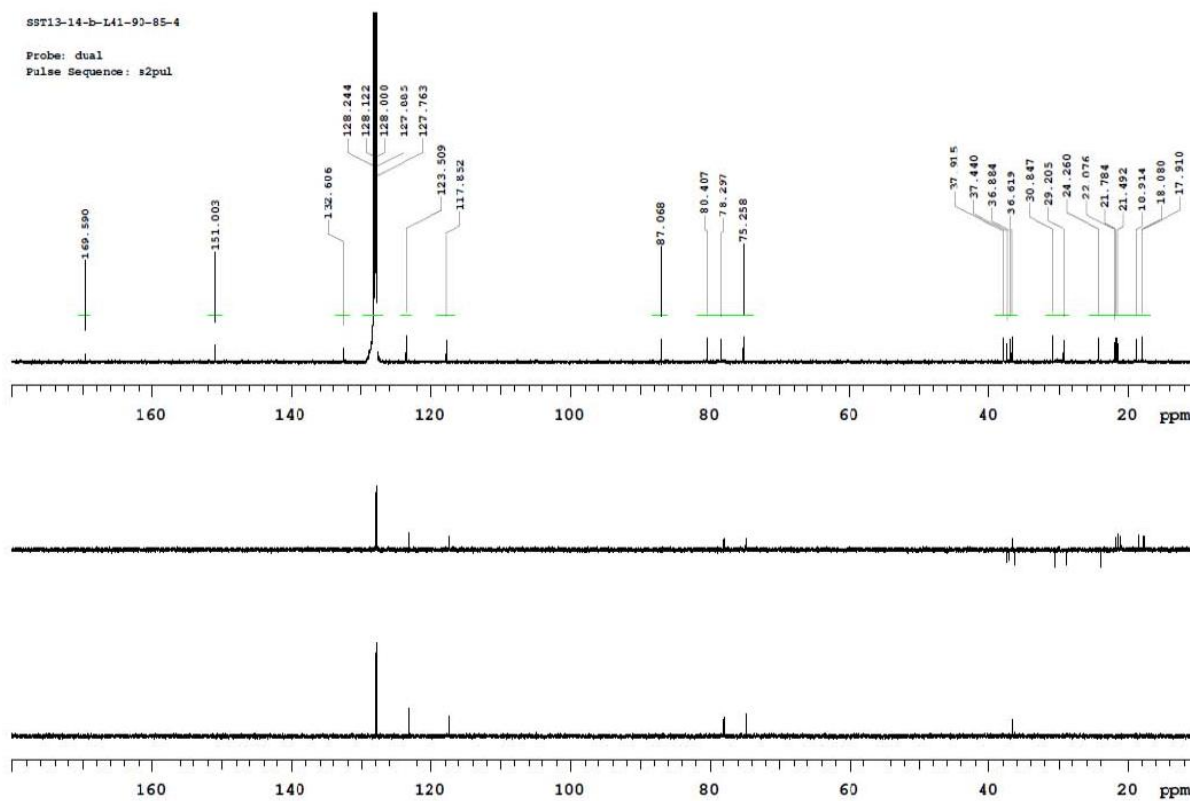

**Figure S9.** COSY spectrum (400 MHz) of compound **2** in C<sub>6</sub>D<sub>6</sub>.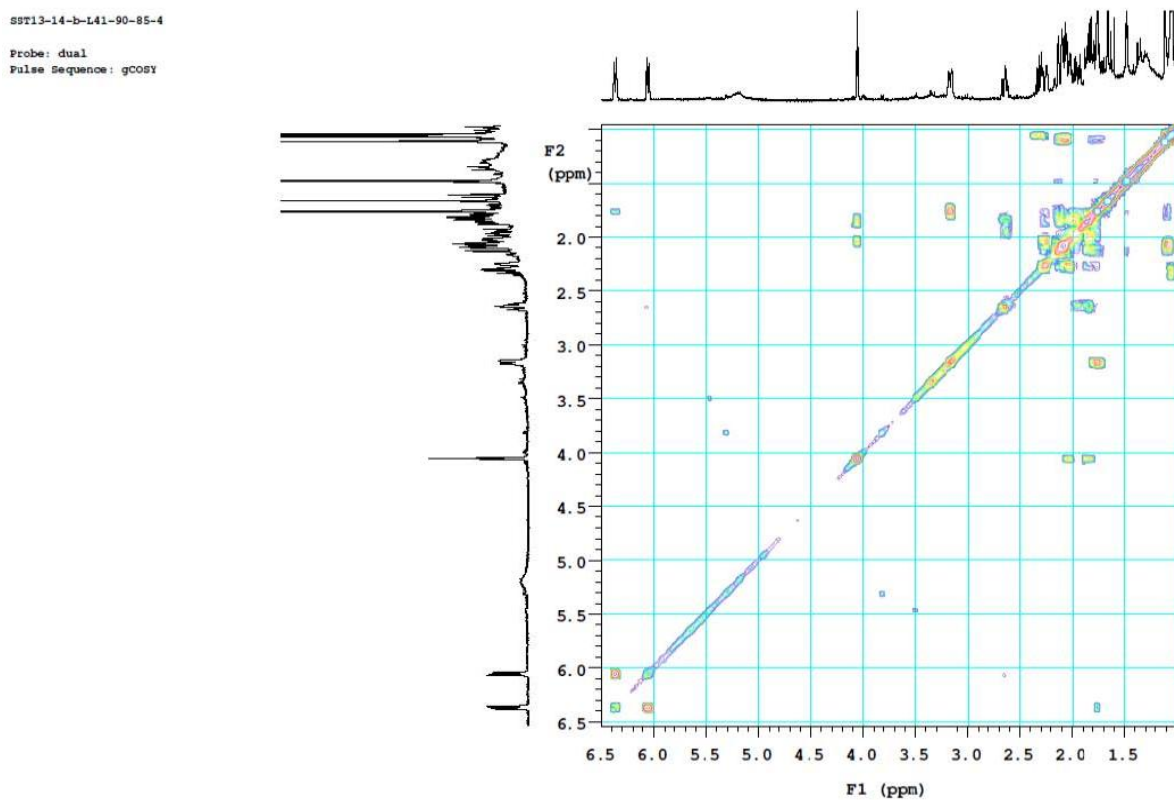**Figure S10.** HSQC spectrum (400 MHz) of compound **2** in C<sub>6</sub>D<sub>6</sub>.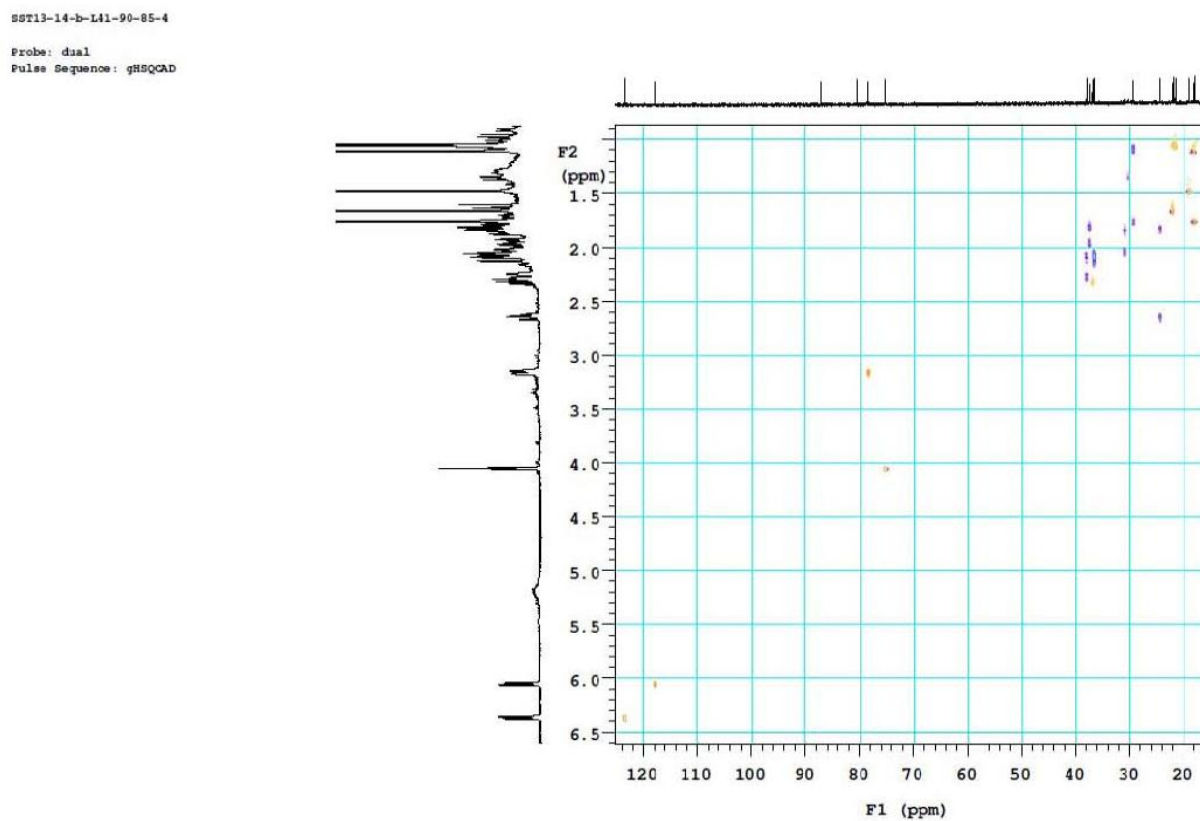

**Figure S11.** HMBC spectrum (400 MHz) of compound 2 in C<sub>6</sub>D<sub>6</sub>.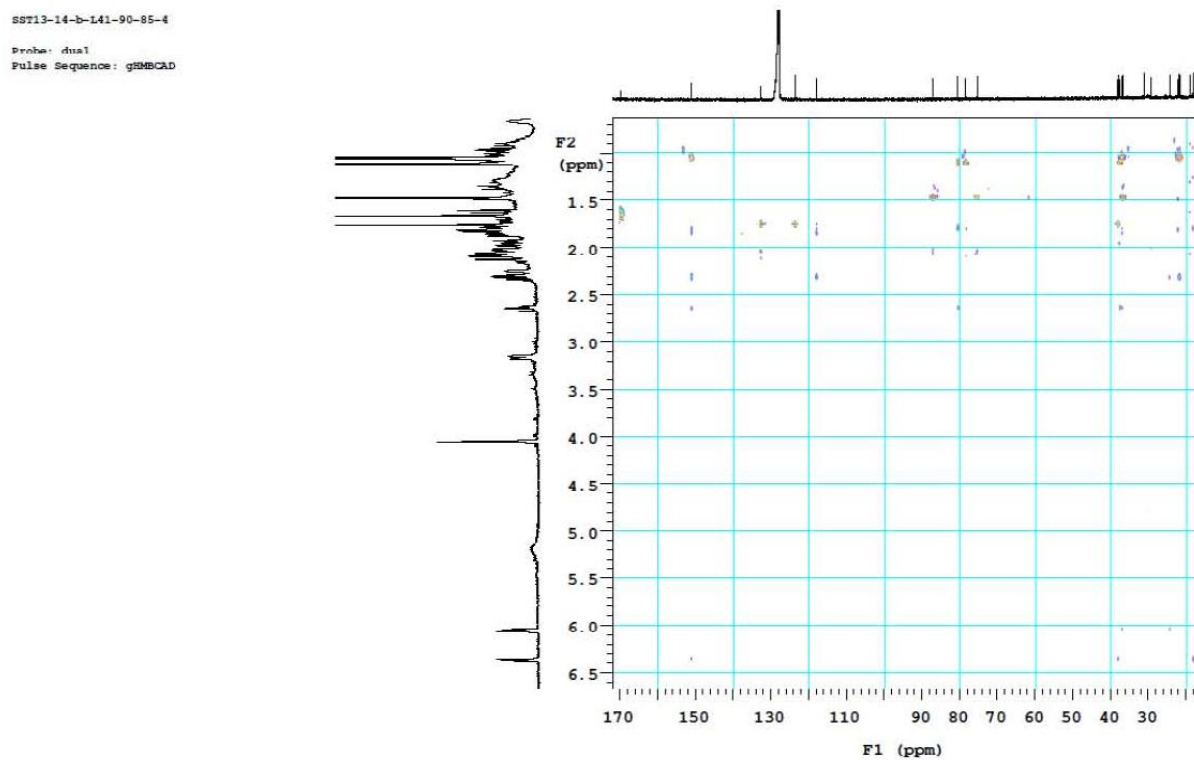**Figure S12.** NOESY spectrum (400 MHz) of compound 2 in C<sub>6</sub>D<sub>6</sub>.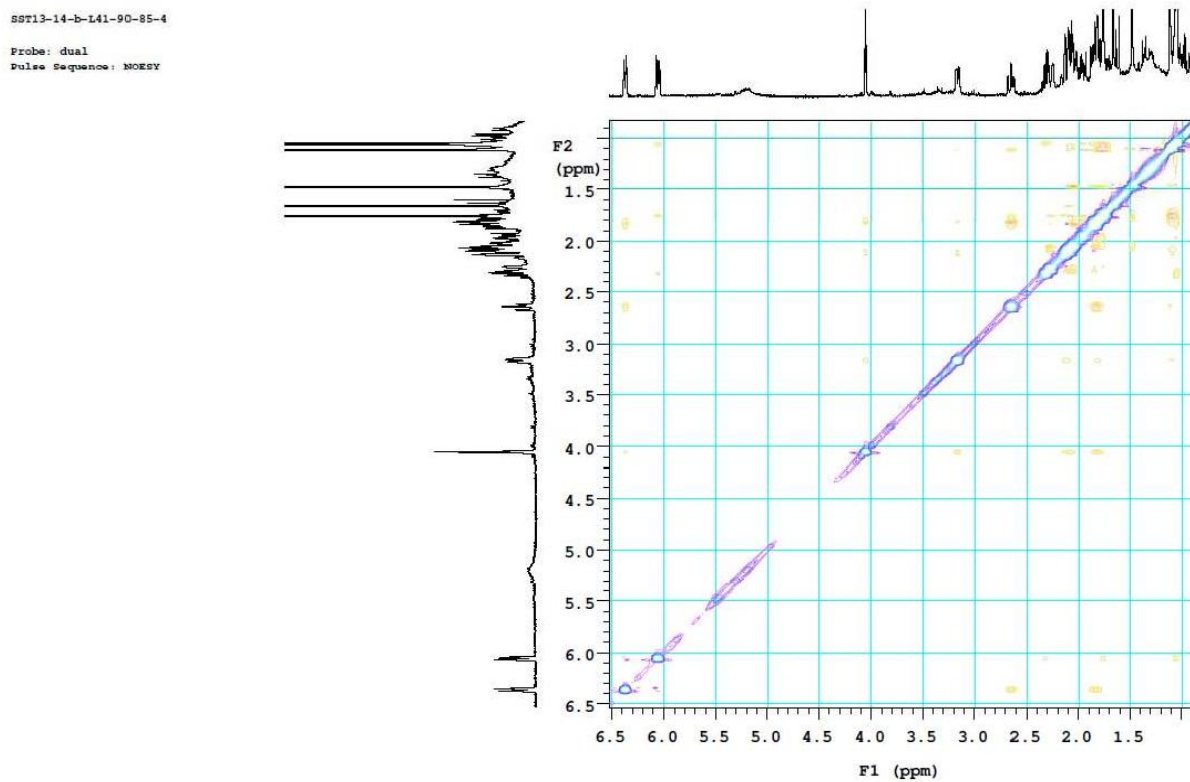

Supplement: marinedrugs-11-04318-s001.pdf [file marinedrugs-11-04318-s001.pdf]
